# Supplementary figures and images for: Trends in the incidence and mortality of multiple births by socioeconomic deprivation and maternal age in England: population-based cohort study
Source: HighWire-hosted journal article supplement (doi:10.1136/bmjopen-2013-004514), 2014-04-01

Supplementary Figure:

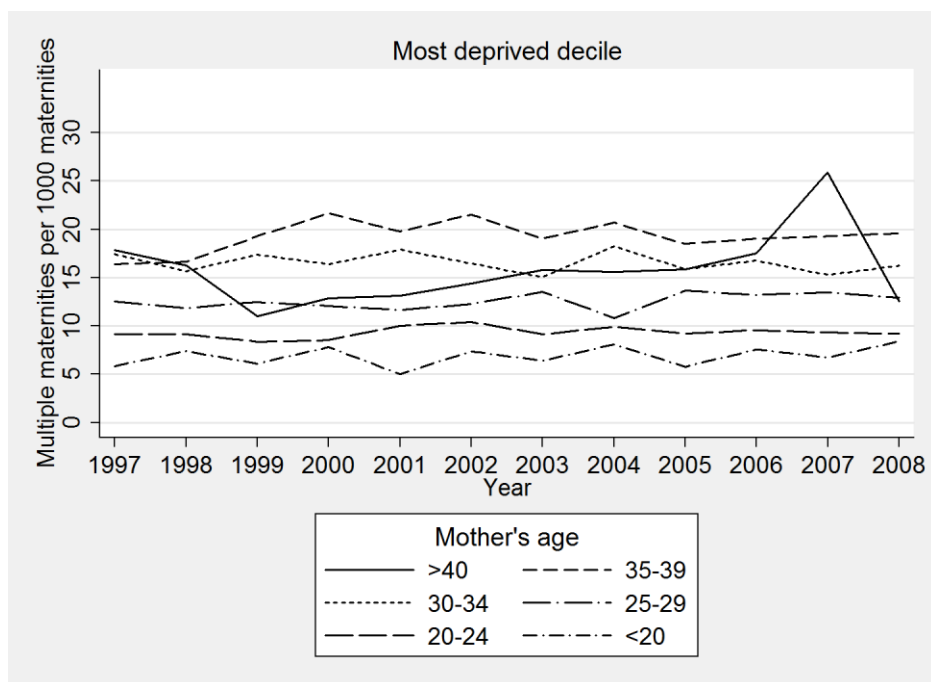

Supplement: bmjopen-2013-004514supp.pdf [file bmjopen-2013-004514supp.pdf]
